# Supplementary material
Source: ML conference proceedings conference paper supplement (https://proceedings.neurips.cc/paper_files/paper/2015/hash/55c567fd4395ecef6d936cf77b8d5b2b-Abstract.html)
Supplement: Supplementary file [file 55c567fd4395ecef6d936cf77b8d5b2b-Supplemental.zip]

## A Proof of Theorem 1

**Proposition 3.** *There exist constants  $C_1, C_2 > 0$  such that  $C_1(p^* - p)^2 < f(p^*) - f(p) < C_2(p^* - p)^2$  for all  $p \in [0, 1]$ .*

*Proof.* Since the second derivative  $f''(p^*)$  exists, it follows that

$$\lim_{p \rightarrow p^*} \frac{f(p^*) - f(p)}{(p^* - p)^2} \rightarrow \frac{f''(p^*)}{2}.$$

It then follows by definition that there exists  $\delta$  such that  $0 < |p - p^*| < \delta$  implies  $0 < -\frac{f''(p^*)}{4}(p^* - p)^2 \leq f(p^*) - f(p) \leq -\frac{3f''(p^*)}{4}(p^* - p)^2$ . On the other hand, the continuity of  $g: p \rightarrow \frac{f(p^*) - f(p)}{p^* - p}$  on the set  $X = \{p \in [0, 1] \mid |p^* - p| \geq \delta\}$ , as well as the compactness of  $X$  implies

$$0 < \min_{p \in X} g(p) \leq g(p) \leq \max_{p \in X} g(p),$$

where we have used the fact that  $g(p) > 0$  for all  $p \in X$ . The result of the proposition straightforwardly follows from these observations.  $\square$

**Proposition 4.** *Let  $p_i = \frac{i}{K} \in \mathcal{P}_K$  and define  $\bar{\Delta}_i = \Delta_{p_i}$ . Then,  $\bar{\Delta}_i > C_1(p^* - \frac{i}{K})^2$  for all  $i$ . Moreover, there exists a reordering  $i_0, \dots, i_{K-1}$  such that  $\bar{\Delta}_{i_j} \geq C_1(\frac{j}{2K})^2$ .*

*Proof.* From Proposition 3 it follows that  $\Delta_i > C_1(p^* - \frac{i}{K})^2$ . The reordering is defined recursively as follows  $i_0 = \operatorname{argmin}_i (p^* - \frac{i}{K})^2$  and  $i_j = \operatorname{argmin}_{i \notin \{i_0, \dots, i_{j-1}\}} (p^* - \frac{i}{K})^2$ . Since there are at most  $j - 1$  elements in this set  $\mathcal{P}_K$  at distance at most  $\frac{j-1}{K}$  from  $p^*$ , it follows that  $\Delta_{i_j} \geq (p^* - \frac{i_j}{K})^2 \geq (\frac{j}{2K})^2$ .  $\square$

**Proposition 5.** *The optimal price  $p_K$  satisfies,  $f(p_K) \geq f(p^*) - \frac{C_2}{K^2}$ .*

*Proof.* Let  $\hat{p}$  be the element in  $\mathcal{P}_K$  closer to  $p^*$ , then  $(\hat{p} - p^*)^2 \leq \frac{1}{K^2}$  and by Proposition 3 we have

$$\frac{C_2}{K^2} \geq f(p^*) - f(\hat{p}) \geq f(p^*) - f(p_K).$$

$\square$

**Theorem 1.** *Let  $K = (\frac{T}{\log T})^{1/4}$ , if the discounting factor  $\gamma$  satisfies  $\gamma \leq \gamma_0 < 1$  and the seller uses the R-UCB<sub>L</sub> algorithm with set of prices  $\mathcal{P}_K$  and  $L = \lceil \frac{\log(1/\epsilon(1-\gamma_0))}{\log(1/\gamma_0)} \rceil$ , then the strategic regret of the seller can be bounded as follows:*

$$\max_{p \in [0, 1]} f(p) - \mathbb{E} \left[ \sum_{t=1}^T a_t p_t \right] \leq C \sqrt{T \log T} + \left\lceil \frac{\log \frac{1}{\epsilon(1-\gamma_0)}}{\log \frac{1}{\gamma_0}} \right\rceil \left( \left( \frac{T}{\log T} \right)^{1/4} + 1 \right).$$

*Proof.* If  $p_K = \operatorname{argmax}_{p \in \mathcal{P}_K} f(p)$ , then by Proposition 5 we have:

$$\begin{aligned} \max_{p \in [0, 1]} T f(p) - \mathbb{E} \left[ \sum_{t=1}^T a_t p_t \right] &= \max_{p \in [0, 1]} T f(p) - T f(p_K) + T f(p_K) - \mathbb{E} \left[ \sum_{t=1}^T a_t p_t \right] \\ &\leq \frac{TC_2}{K^2} + T f(p_K) - \mathbb{E} \left[ \sum_{t=1}^T a_t p_t \right] \\ &= C_2 \sqrt{T \log T} + T f(p_K) - \mathbb{E} \left[ \sum_{t=1}^T a_t p_t \right]. \end{aligned} \tag{5}$$

The last term in the previous expression corresponds to the regret of the buyer when using a discrete set of prices. By Corollary 2 this term can be bounded by

$$\left\lceil \frac{\log \frac{1}{\epsilon(1-\gamma_0)}}{\log \frac{1}{\gamma_0}} \right\rceil \left( 4 \sum_{p: \Delta_p > \delta} p + 1 \right) + \sum_{p: \Delta_p > \delta} \frac{32 \log T}{\Delta_p} + 2\Delta_p + T\delta.$$

Letting  $i_j$  be as in Proposition 4, we have

$$\Delta_{p_{i_j}} = \bar{\Delta}_{i_j} + f(p_K) - f(p^*) \geq C_1 \left( \frac{j}{2K} \right)^2 - \frac{C_2}{K^2}.$$

Letting  $\delta = \sqrt{\frac{\log T}{T}}$  and  $j_0 = \sqrt{\frac{8C_2}{C_1}}$  we have  $\Delta_{p_{i_j}} \geq \frac{C_1 j^2}{8K^2}$  for  $j \geq j_0$ . Therefore

$$\begin{aligned} \sum_{p: \Delta_p > \delta} \frac{32 \log T}{\Delta_p} + 2\Delta_p + T\delta &\leq 32 \log T \left( \frac{j_0}{\delta} + \frac{8K^2}{C_1} \sum_{j=j_0}^K \frac{1}{j^2} \right) + 2K + \frac{T\sqrt{\log T}}{\sqrt{T}} \\ &\leq 32 \log T \left( \sqrt{\frac{8C_2 T}{C_1 \log T}} + \frac{4\pi^2}{3C_1} \frac{\sqrt{T}}{\sqrt{\log T}} \right) + 2 \left( \frac{T}{\log T} \right)^{1/4} + \sqrt{T \log T} \\ &= \left( 32 \left( \sqrt{\frac{8C_2}{C_1}} + \frac{4\pi^2}{3C_1} \right) + 1 \right) \sqrt{T \log T} + 2 \left( \frac{T}{\log T} \right)^{1/4}. \end{aligned}$$

Finally, we have  $\sum_{p: \Delta_p > \delta} p \leq K + 1 = \left( \frac{T}{\log T} \right)^{1/4} + 1$ . Substituting these bounds into (5) gives the desired result.  $\square$
